# Supplementary material for: Prediction of Difficult Airways in Elderly Patients Using Bedside Ultrasound: A Prospective Single-Blind Observational Study
Source: Research Square preprint supplement (doi:10.21203/rs.3.rs-6804003/v1), 2025-07-02
Supplement: Supplementary file 1 [file ccf4bf7d88205032f2058fec.xlsx]

## Sheet: Sheet1
Age	Sex	Weight	BMI	MMS	IID	TMD	SMD	MCTD	TV	TT	HMDe	HMDR	C-L grading	IDS＞5
65	1	65	20.3	1	4.5	6.9	18.6	1.74	113.9	5.87	5.89	1.44	1	1
60	2	83	32.4	2	4.8	6.5	16	1.35	107.5	5.83	5.83	1.13	1	1
71	2	61	24.4	2	5.5	6.5	15.5	1.8	106.7	6.42	5.71	1.31	1	1
65	1	70	23.4	1	5	7.1	18.1	1.69	128.7	5.99	5.66	1.18	1	1
61	2	44	15.4	1	5.1	7.1	14	1.51	91.5	6.12	4.79	1.19	1	1
64	2	44	19.3	1	4.9	7.5	14.6	1.34	75.6	5.21	4.91	1.12	1	1
76	1	67	26.2	1	5.8	7.6	17.1	1.72	140.2	6.76	5.57	1.51	1	1
70	2	56	22.7	3	5	7.1	15.2	1.51	66.9	5	4.57	1.15	1	1
60	1	60	23.4	3	4.7	6.9	16.2	1.6	103.4	5.12	5.54	1.39	1	1
82	1	65	23.9	1	5.6	7.3	18.2	1.57	97.1	5.35	5.7	1.63	1	1
60	2	64.5	23.7	1	5.7	7.6	15.5	1.73	107.2	5.8	5.31	1.4	1	1
62	2	50	20.8	1	4.9	7.5	14.4	1.66	80.6	5.1	4.4	1.14	1	1
70	2	53	21.5	1	4.8	6.7	14.7	1.58	78.4	5.3	5.26	1.34	1	1
60	1	49	18	1	4.6	6.1	14.1	1.53	101	5.77	4.62	1.19	1	1
67	1	55	14.4	1	4.9	6	13.6	1.42	105.2	5.35	5.19	1.59	1	1
71	2	43	17.7	1	5.3	6.4	14.3	1.69	78.2	5.3	4.29	1.47	1	1
71	2	45	18	1	4.8	6.8	14.8	1.45	76.5	5.12	4.89	1.23	1	1
65	1	48	16.6	1	4.2	7.4	16.9	1.45	87.9	4.77	4.57	1.23	1	1
63	1	55	20.2	1	4.4	7.4	16.4	1.63	83.7	5.55	4.77	1.52	1	1
67	1	50	18.4	1	4.9	8.2	16.3	1.15	107.9	5.8	5.24	1.11	1	1
78	1	55	20.2	1	4.4	7.8	17.6	1.73	107.1	5.71	4.82	1.32	1	1
66	2	62.5	26	1	5.8	7.2	14.1	1.57	104.2	5.26	5.92	1.56	1	1
60	2	62	23.1	1	5.3	6.2	16.1	1.71	65.5	5.71	5.44	1.3	1	1
61	2	58	23.8	1	4.3	6.3	16.4	1.29	74.9	4.88	4.74	1.2	1	1
65	1	73	24.7	1	5.1	7.1	15.6	1.16	121.4	6.5	4.72	1.29	1	1
60	1	60	22	3	4.7	6.7	16.5	1.33	80.9	5.23	5.23	1.15	1	1
67	1	55	21.5	3	4.6	7.2	16	1.35	94.2	5.78	4.78	1.44	1	1
60	1	55.5	19.2	2	5.6	7.6	19.3	2.05	95.9	5.42	5.63	1.26	1	1
67	2	58.5	23.4	1	4.5	5.8	15.3	1.61	101.3	6.51	4.58	1.35	1	1
69	2	67	26.2	1	4.1	5.8	15.8	1.55	95	6.08	5.27	1.35	1	1
79	1	79	27.3	2	4.7	6.1	13.5	1.32	94	6.12	4.26	1.21	1	1
88	2	53	21.2	3	4.1	6.8	15.9	1.48	84.8	4.85	5.16	1.36	1	1
68	1	59	19.3	1	4.9	7.6	18.1	1.58	118.5	5.5	5.36	1.31	1	1
65	1	70	24.2	4	5.3	7.3	17.2	1.57	108.6	5.8	5.72	1.45	1	1
64	2	50	22.2	1	4.7	7.1	15.9	1.39	70.1	4.85	5.13	1.47	1	1
73	1	59	24.3	1	5	7.5	15.4	1.47	114.9	6.16	5.2	1.43	1	1
70	1	55	19	3	3.4	7.3	18.9	1.42	94.7	4.79	4.78	1.42	1	1
62	2	45	23	1	4.4	6.6	16.9	1.59	58	5.37	4.96	1.41	1	1
73	2	49.5	21.4	3	5.1	7	15.9	1.58	94.2	5.52	4.89	1.45	1	1
61	1	55	22	1	4.4	6.8	15.4	1.47	92.5	5.69	4.98	1.48	1	1
70	2	55	19	2	4.2	5.8	13.1	1.12	82.5	5.87	4.59	1.44	1	1
65	1	71	24.6	2	4.6	8.6	19.8	1.36	108.6	5.58	5.46	1.34	1	1
64	2	55	22	1	4.9	6.5	15.9	1.49	81.6	6	4.64	1.45	1	1
62	1	75	27.5	3	3.8	5.9	14.7	1.14	76.2	5.26	3.88	1.27	1	1
82	2	52	23.1	4	4.6	7.6	15.6	1.7	73.7	5.72	4.74	1.2	1	1
69	2	61	24.4	2	4.6	7.5	13.5	2.09	85.38	5.25	4.77	1.31	1	1
68	2	46	18.9	2	4.5	7	13.5	1.3	83.75	6.4	4	1.2	1	1
64	1	70	27.3	3	3.8	7.3	16.5	1.37	96.5	6.33	4.26	1.17	1	1
69	2	46	19.1	1	4.5	7.1	17.2	1.47	99.6	5.59	4.75	1.26	1	1
75	1	60	21.5	2	4.6	6.8	16.2	1.18	112.6	4.91	5.68	1.27	1	1
73	2	47.5	21.4	1	5.1	6	14.1	1.39	76.8	4.49	4.55	1.14	1	1
71	1	64	21.6	2	5	7.1	16.5	1.61	119	5.58	5.23	1.44	1	1
64	2	78	32.5	3	4.4	6.6	13.8	1.6	105.3	5.97	5.59	1.44	1	1
67	2	43	18.6	2	3.8	7.1	15.7	1.38	83.6	6.28	4.19	1.45	1	1
74	1	56	21.9	1	4.4	5.9	13.5	1.38	86.5	5.68	4.62	1.17	1	1
67	2	64	24.7	3	4.7	6.5	13.8	1.86	105.7	6.53	4.89	1.11	1	1
61	2	52	21.4	3	4.3	6.3	14.6	1.59	123.1	5.7	5.22	1.22	1	1
68	2	61	24.1	1	4.2	5.5	12.6	0.99	97.8	5.36	4.75	1.09	1	1
60	1	70	24.2	3	4.2	5.4	12.9	1.46	102.3	5.53	4.51	1.19	1	1
67	2	55	21.5	1	4.1	7	13.5	1.53	100	5.77	5.02	1.25	1	1
69	1	65	22.5	2	3.8	5.8	13.8	1.45	106.4	5.59	4.91	1.29	1	1
67	2	48	21.6	2	3.8	6.7	15.3	1.35	70.1	5.18	4.2	1.28	1	1
84	2	47	20.9	2	4.2	7	15.3	1.64	59.4	5.26	3.53	1.18	1	1
61	2	60	23.4	1	3.9	5.9	13.5	1.61	89.9	5.9	4.65	1.25	1	1
74	2	65	23.6	3	4.5	5.5	15.1	1.38	92.6	6.11	4.91	1.21	1	1
77	2	50	27.4	3	3.5	5.1	11.3	1.26	88.6	5.6	4.27	1.31	1	1
67	1	70	22.9	2	4.4	6.4	13.9	1.48	95.9	6.82	4.24	1.35	1	1
66	1	79	25.2	2	4	7.8	15.9	1.73	117.6	6.21	5.21	1.16	1	1
62	1	72.5	24.5	1	4.7	7.6	18.6	1.44	140.2	6.14	5.34	1.3	1	1
69	2	60	23.4	3	4.9	7.1	16.8	1.45	124.5	6.05	4.75	1.43	1	1
60	2	60	25.8	2	4.1	6.2	14.1	1.66	102.8	6.01	4.85	1.43	1	1
70	2	44	19.6	3	4	5.8	16.1	1.31	75.9	5.38	3.97	1.37	1	1
68	2	56	21.9	2	3.9	6.3	16.3	1.24	90	5.35	4.94	1.3	1	1
72	2	74	27.1	4	3.7	7.3	15.7	1.21	130.3	6.38	4.89	1.43	1	1
75	2	58	25.8	2	4.7	6.5	15.6	1.38	122.9	5.82	4.87	1.37	1	1
63	2	60	27.8	1	4.9	6.7	16.2	1.51	74.8	4.72	5.11	1.24	1	1
60	1	53	17.3	2	4.4	7.9	16.3	1.7	104.1	6.03	4.65	1.36	1	1
66	2	52	21.1	3	4.2	7.1	17.6	1.56	71.8	5.72	4.87	1.24	1	1
71	1	70	24.8	1	4.7	7.1	17.1	1.55	102.5	5.78	4.95	1.15	1	1
63	2	48.5	20.2	1	4.4	6.4	14.9	1.21	78.6	5.29	4.62	1.23	1	1
77	2	50	20.8	3	4.3	5.7	14.3	1.71	82.5	5.87	4.97	1.37	1	1
68	2	57	24	3	4.8	6.5	17.1	1.44	94.6	5.33	5.07	1.3	1	1
75	2	58	23.2	2	4.8	6.2	15.4	1.62	79.3	5.91	4.08	1.07	1	1
60	2	45	18.3	1	3.9	6.7	15.3	1.02	83	4.89	4.83	1.42	1	1
72	1	86	26.5	3	4.1	5.7	13.7	1.36	130.4	5.73	5.77	1.48	1	1
74	1	60	22.7	1	5.1	7.6	15.3	1.42	96.4	6.11	5.1	1.38	1	1
66	2	60	25	2	3.9	5.5	12.2	1.2	116.4	6.2	4.92	1.09	1	1
84	1	58	20.1	3	4.2	7.6	17.2	1.16	114.9	5.92	4.94	1.56	1	1
71	1	88	28.1	3	4.5	7.5	16.2	1.26	145.5	6.75	6.29	1.35	1	1
69	2	60	22.6	3	4.4	6	75.8	1.36	81.1	5.8	4.93	1.24	1	1
71	2	56.5	23.5	1	4.9	6.9	13.8	1.53	63.6	5.08	4.74	1.21	1	1
63	1	62	24	2	4.5	6.6	16.4	1.57	83.2	5.46	4.83	1.37	1	1
64	2	62	25.2	1	4.1	6.3	13.6	1.48	112.6	5.99	5.54	1.36	1	1
72	2	60	22.6	2	5	7	15	1.96	91.8	5.88	5.31	1.23	1	1
82	2	57.5	23	3	3.5	5.5	13.5	1.32	93.76	6.45	4.54	1.46	1	1
70	2	55	20.4	3	4.7	7.1	18.5	1.81	110.5	5.6	5.67	1.34	1	1
62	2	59	24.6	2	4.2	6.2	17.3	1.48	81	5.72	4.92	1.23	1	1
73	1	54	23.4	1	5.1	6.2	16.2	1.38	86.35	5.61	4.65	1.37	1	1
68	2	65	28.9	3	3.8	6.5	13.8	1.56	120.1	6.69	5.05	1.27	1	1
72	2	57	25.3	2	4.4	5.5	14.1	1.33	83.1	5.45	4.61	1.15	1	1
65	2	51	26	2	4.7	6	13.1	1.42	98.8	5.71	4.51	1.32	1	1
66	2	50	19.1	1	5.1	6.7	17.1	1.76	115.2	5.38	5.07	1.22	1	1
60	1	54	22.5	2	4.8	6.7	13.1	1.31	91.8	5.66	4.65	1.34	1	1
71	2	44	16.8	2	4.9	6.8	16.3	1.25	88.6	5.99	4.47	1.21	1	1
60	2	50	20	1	4.2	6.1	15.8	1.46	66.8	5.57	4.21	1.14	1	1
66	1	62	22.2	3	5.1	6.6	16.5	1.76	106.1	5.65	5.73	1.18	1	1
77	2	57	23.4	3	4.1	6.2	14.1	1.41	86.6	5.66	4.15	1.24	1	1
76	2	54	22.5	1	5	6.8	16.8	1.41	99.2	5.76	5.61	1.46	1	1
76	1	64	23.8	1	4.2	6.3	15.7	1.57	144.7	6.14	5.87	1.48	1	1
61	2	64	26.6	1	4.7	6.7	13.9	1.4	104.9	6.29	4.85	1.29	1	1
70	2	58	24.1	1	4.8	6.6	12.6	1.6	96.6	5.53	4.75	1.24	1	1
75	1	64	22.7	1	4.2	7	16.2	1.71	127.3	6.76	4.44	1.36	1	1
69	1	59	23	2	4.7	6.6	16.2	1.65	86.1	6.02	4.68	1.5	1	1
61	2	55	23.8	1	4.6	6.4	13.5	1.25	87.7	5.83	4.75	1.36	1	1
67	1	60	22.6	3	3.6	6.3	15.8	1.18	70.9	6.01	4.41	1.26	1	1
86	2	56.5	26.5	1	5.4	6.4	14.1	1.59	74.8	5.61	4.21	1.29	1	1
64	2	55	23.5	3	3.8	6.8	15.9	1.61	74.1	5.43	4.75	1.45	1	1
60	1	71	26.4	3	4.7	7.6	16.2	1.75	98	6.06	5.45	1.27	1	1
75	2	62.5	23	1	4	6.7	15.6	1.26	85	6.25	4.26	1.19	1	1
69	1	57	17.6	3	4.9	6.6	20.2	1.78	89.7	5.61	4.6	1.47	1	1
76	2	57.5	24.6	3	4	6.5	12.5	1.17	80.8	6.29	4.36	1.16	1	1
70	2	54	21.6	3	3.8	6.3	14.8	1.44	72.8	5.17	4.59	1.24	1	1
70	1	75	25.1	2	4	8	16	1.5	136	6.22	4.91	1.18	1	1
64	1	58	21	3	4.2	6.9	15.5	1.31	105.3	4.79	5.82	1.11	1	1
60	2	59	23.6	3	4	6.2	14.5	1.37	125.8	5.92	5.78	1.15	1	1
78	2	60	22.9	2	4.7	6.3	15.5	1.39	93.5	6.33	4.86	1.21	1	1
74	1	51	19.2	2	3.9	6.3	15.1	1.51	95.7	5.8	4.52	1.09	1	1
64	2	59	22.5	2	4.2	7.1	15.1	1.51	124	6.12	4.77	1.15	1	1
71	1	71	25.2	3	3.9	6.1	16.8	1.6	133.6	6.59	5.44	1.19	1	1
82	1	56	21.3	1	4.2	6.9	15.2	1.35	90.6	5.89	4.79	1.17	1	1
69	2	65	26.3	1	5.4	7.6	14.9	1.22	103.3	6.11	4.73	1.12	1	1
69	1	57	22.8	3	5.1	6.8	15.9	1.21	118.3	6.16	5.82	1.19	1	1
68	2	55	22.3	1	4.9	6.9	16.2	1.28	92.8	5.97	4.69	1.13	1	1
67	2	60	24.3	4	3.2	7.5	12.9	1.28	70.1	5.87	4.51	1.29	1	1
71	2	58	25.8	3	3.9	5.9	12.1	1.08	109.6	6.2	5.12	1.13	1	1
64	2	69	27	3	4.1	5.8	15.9	1.55	105.2	6.11	5.23	1.23	1	1
67	1	73	25	3	4	6.2	12.5	1.11	150	7.17	5.13	1.11	1	1
78	2	50	19.1	3	4.2	6.8	12.6	1.31	88.6	5.95	4.17	1.21	1	1
61	2	71	33.8	3	4.1	5	11.9	0.96	82.7	6.13	5.44	1.19	1	1
62	1	56	20.1	2	3.6	5.9	13.5	0.85	86.8	6	3.85	1.15	1	1
71	2	75	30	1	4.2	5.3	14.4	1.29	95.6	6.39	4.85	1.16	1	1
67	2	56	23	1	3.9	5.3	11.5	1.27	69.1	5.32	3.87	1.35	1	1
60	2	58	22.7	1	3.9	5.7	15	1.06	83.6	6.11	4.43	1.26	1	1
66	1	70	23.9	2	4.2	6.5	14.2	0.84	98.9	5.58	5.03	1.34	1	1
74	1	57	22.3	3	4.5	7.7	15.4	1.08	122.4	6.28	5.18	1.14	1	1
60	2	61	26.1	3	3.9	6.4	15.3	1.23	98.3	5.84	5.02	1.41	1	1
72	2	65	25.4	1	4.8	6	16.1	1.36	105.6	6.28	4.41	1.13	1	1
86	1	67	24.6	3	4	7.1	16.2	1.04	88.2	5.68	4.89	1.12	1	1
60	2	56	22.7	2	3.9	6.6	15.8	1.38	103	6.15	4.51	1.09	1	1
64	1	72	27.1	4	4.3	5.8	12.7	1.3	127.1	6.14	4.7	1.28	1	1
72	2	55	22.9	3	3.8	6	17.2	1.5	78.9	6.26	5.26	1.12	1	1
74	2	68	24.1	3	4.2	6.1	14.9	1.13	102.2	6.64	4.39	1.24	1	1
60	1	60	20.8	3	4.6	7.6	18.2	1.09	126.8	6.62	4.73	1.27	1	1
72	2	53	21.2	1	3.8	5.9	13.6	1.07	76.6	5.68	4.41	1.09	1	1
66	2	49	21.5	2	4.4	5.7	14.2	1.12	74.7	6.08	4.22	1.08	1	1
60	2	66	26.4	1	5.4	6.3	15.6	1.18	76.4	5.96	4.27	1.08	1	1
64	1	60	20.8	2	4.7	7.6	17.3	1.47	99.7	6.25	4.44	1.17	1	1
84	1	72	24.6	4	4.6	6.8	15.7	1.55	118.9	7.24	4.86	1.39	1	1
67	2	67	27.5	3	5.1	7.7	14.9	1.25	124.7	5.88	5.39	1.18	1	1
61	2	52	23.1	1	4.7	6	14.4	1.36	73.7	5.92	4.46	1.27	1	1
60	2	64	27	3	4.1	5.9	13.6	1.2	79.6	5.91	4.17	1.19	1	1
70	2	73	32.4	1	4.8	6.2	14.7	1.44	104.2	6.62	4.24	1.18	1	1
69	1	74	24.2	4	4.1	7.3	18.3	1.29	122.7	6.38	5.39	1.36	1	1
60	2	61	24.4	3	5	6.4	16.9	1.51	101.2	6.29	4.38	1.1	1	1
69	1	73	25.3	3	3.9	5.6	13.7	1.19	116.1	6.71	4.75	1.2	1	1
61	1	57	19.7	3	4.6	7.5	15.4	1.36	135.2	6.58	4.9	1.21	1	1
64	2	54	24	3	3.7	5.9	15.2	1.25	94.5	6.02	3.92	1.3	1	1
73	1	60	20.8	2	3.4	5.7	15.2	1.32	76.8	5.91	3.73	1.21	1	1
68	1	59	24.6	2	4.3	6.2	12.3	1.31	92.9	6.67	3.85	1.44	1	1
65	1	54	18.9	3	4.3	7.2	16.2	1.53	116.4	6.21	5.76	1.31	1	1
61	1	67	23.7	2	4.2	6.9	15.2	1.32	135.3	6.77	4.27	1.22	1	1
71	2	52	20.3	3	3.8	6.8	16.1	1.1	94.7	5.66	5.06	1.28	1	1
78	1	63	23.1	3	4.4	6.1	14.5	1.53	74	5.69	4.81	1.2	1	1
64	1	74	25.3	3	3.9	7.5	13.5	1.31	101.8	5.81	6.05	1.11	1	1
69	2	41	17.3	2	4.9	6.2	15.2	1.71	80.1	5.06	4.91	1.3	1	1
60	1	65	23	3	3.6	6.6	15.5	1.45	91.7	6.08	4.67	1.21	1	1
68	2	74	32	3	4.5	6.5	13	1.32	110.58	6.57	4.78	1.47	1	1
74	1	64	22.1	3	4.5	6	16	1.73	111.6	6.48	4.75	1.12	1	1
67	1	72	28.1	2	4.8	6.1	15	1.3	86.7	6.69	5.24	1.13	1	1
71	2	60	25	3	3.8	6	13.8	1.27	140.7	6.07	5.07	1.24	1	1
60	1	47.5	15.7	3	3.9	5.9	15	1.31	110.2	6.05	4.58	1.26	1	1
60	1	72	27.4	2	4.2	6.8	16.3	1.46	113	7.05	5.02	1.22	1	1
70	1	63	24	2	3.8	5.8	13.8	1.19	72.1	6.39	4.39	1.05	2	2
70	1	63	24	3	3	6	13.9	1.22	94.3	6.09	4.34	1.12	2	1
70	1	75	25.4	3	4.5	6.9	15.6	1.01	130.6	6.99	5.21	1.07	2	2
84	1	63.5	21.5	3	4.2	6.5	13.8	0.74	94.4	5.92	4.56	1.17	2	2
60	1	45	14.5	3	3.2	5	15	1.27	79.9	6.42	3.31	1.31	2	2
77	1	65	25.4	3	4.5	6.4	14	1.17	118.3	6.2	5.57	1.28	2	1
68	1	55	23.8	3	3.6	4.6	12	0.87	69.4	6.25	4.01	1.18	2	2
78	1	59	24.6	4	3.5	6.1	13.5	1.09	97.38	6.04	4.32	1.3	2	2
74	1	64	25.3	4	3.1	6.2	14.1	0.72	110.3	6.54	5.21	1.18	2	2
72	1	84	27.4	3	4.9	6.9	16.2	0.99	127.3	6.81	4.65	1.24	2	1
69	1	53	22.9	3	2.8	5.4	10.5	1.09	97.4	5.58	4.99	1.04	2	2
72	1	81	28	3	4.5	5.9	11.8	0.94	127.1	6.55	5.16	1.14	2	2
64	1	59	20.7	3	3.5	7.3	16.3	1.17	109.9	6.3	5.02	1.14	2	1
60	1	56	23	2	4	5.4	16.3	1.17	87.73	6.34	4.78	1.31	2	1
71	1	60	20.8	4	3.6	5.4	13.3	0.8	85.5	6.61	4.29	1.1	2	2
77	1	47	19.3	2	4.4	5.6	12.1	1.19	88.1	5.64	4.35	1.2	2	1
69	1	77	32.9	4	3.6	5.5	12.6	1.1	97.7	6.71	4.32	1.13	2	1
71	1	50	18.4	3	3.8	5.9	14.1	0.93	75.9	5.65	3.94	1.09	2	2
64	1	72	25.5	3	4.2	8.1	16.2	1.1	117.3	6.34	4.97	1.15	2	1
67	1	69	24.4	2	4.4	6.2	13.9	1.08	113	6.8	4.46	1.18	2	2
60	1	45	15.2	2	3.7	6.3	16.5	1.31	74	4.9	4.1	1.1	2	1
68	1	71	24.6	4	3.8	6	14.5	0.98	130.6	6.51	4.81	1.03	2	2
68	1	66	24.2	3	3.3	5.9	13.6	0.62	77.7	6.42	3.92	1.18	2	2
61	1	56	21.9	1	4.2	5.8	15.4	1.09	68.7	6.35	3.91	1.16	2	1
86	1	62.5	23	4	4.1	5.9	12.1	0.93	107	6.62	4.81	1.11	2	2
64	1	67	23.2	3	3.8	5.8	14.6	0.92	74.4	6.02	3.88	1.43	2	2
73	1	71	24.6	3	4.2	6.2	13.7	0.92	75.2	6.09	4.35	1.2	2	2
67	1	72	24.9	4	3.6	5.9	13.7	1.14	97.8	6.74	4.06	1.2	2	1
60	1	80	27	3	3.7	5.6	15.5	1.35	131.3	6	5.74	1.19	2	1
65	1	51	19.9	4	3.4	5.7	13.7	1.08	108.9	6.68	4.9	1.5	2	2
61	1	55	19.5	3	3.3	6.1	15	1.17	97.4	6.2	4.38	1.08	2	2
67	1	53	19.9	2	3.9	7	15.9	1.46	81.2	6.81	4.55	1.09	2	2
60	1	70.5	24.7	4	3.7	6.7	15.3	0.84	113.1	6.95	4.32	1.18	2	2
73	2	57.5	23.3	3	3.7	6.3	15.5	1.14	71.7	4.74	4.64	1.19	2	1
61	2	51	19.9	2	3.5	6.5	17	1.26	101	5.96	4.73	1.3	2	1
78	2	39	19.1	3	2.9	4.8	13.1	1.13	57.3	5.26	3.97	1.31	2	2
66	2	46	20.4	4	3.9	6.2	14.2	1.22	89.4	5.74	4.21	1.05	2	2
73	2	71	30.3	3	4.6	6.3	15.6	1.19	139.6	7.01	5.3	1.2	2	1
71	2	45	20	3	4.4	6.2	12.5	1.1	73.4	5.7	4.07	1.11	2	1
60	2	63	24.6	2	4.4	5.2	14.4	1.13	92.7	5.83	4.47	1.17	2	1
65	2	56.5	22.6	2	3.9	6.1	13.1	1.05	99.5	5.78	4.89	1.35	2	1
73	2	59	25.2	1	3.8	5.4	12.3	1.28	71.6	5.68	3.9	1.2	2	2
71	2	50	23.8	3	3.8	5.8	12.1	1.64	90.5	5.71	4.69	1.14	2	1
60	2	70	27	1	3.9	6.7	15.3	0.68	100.1	5.58	4.46	1.13	2	2
